# Supplementary material
Source: publisher figshare collection journal article supplement (https://gsapubs.figshare.com/ndownloader/files/23299673)
Supplement: Supplementary file 1 [file 23299673]

**Part I. NOTES ON CAMBRO-ORDOVICIAN CARBON ISOTOPE COMPOSITE  
CURVE IN FIG. 1**

**CAMBRIAN COMPOSITE REFERENCES FOR FIG.1**

Data all originally published in this paper:

Saltzman, M.R., 2005, Phosphorus, nitrogen, and the redox evolution of the Paleozoic oceans: *Geology*, v. 33, p. 573–576, doi:10.1130/G21535.1.

Age Model from this paper:

Saltzman, M.R. and Thomas, E., 2012, Carbon isotope stratigraphy, *The Geologic Time Scale 2012*, eds Gradstein, F., Ogg, J., Schmitz, M.D., and Ogg, G., p. 207-232. DOI: 10.1016/B978-0-444-59425-9.00011-1

Cambrian composite built from a series of segments in the House Range of Utah and Shingle Pass, Nevada. The portion included in Fig. 1 here – Series 3 through the Furongian are from:

1. **Series 3** – House Range, Utah, Little Horse Canyon (Big Horse Limestone)
2. **Paibian** - Shingle Pass, Nevada (see also Saltzman, M.R., Runnegar, B. and Lohmann, K.C., 1998, Carbon-isotope stratigraphy of the Pterocephaliid Biome in the eastern Great Basin:

Record of a global oceanographic event during the Late Cambrian. Geological Society of America Bulletin, v. 110, p. 285-297.

3. **Jungshanian to “Lawsonian”** – lower part from Sneakover Limestone, including Steptoean-Sunwaptan “biomere boundary”, is from House Range, Utah, Little Horse Canyon (see top of section in Saltzman et al., 1998 above). Upper part is from Whipple Cave Formation, Christmas Tree Canyon in South Egan Range, Nevada (see Ph.D. thesis of M.E. Taylor).

\*Note: **Ordovician** composite portion of Fig. 1 entirely from Argentina section (Buggisch et al., 2003) with age model from Saltzman and Thomas 2012 above

## **Part II. CAPTIONS - SUPPLEMENTARY FIGURES**

Figure. DR1. Locality map after Edwards and Saltzman (2014) showing close up of Ibex sections LDN, B, and 1965-C from Ross et al. (1997).

Figure. DR2. Cross plot of carbon versus oxygen isotopes. Note that this plot does not include a small number of LDN and B-Top samples that were late additions to manuscript **Fig. 3** in the final revision (see **Tables S1-S3** for complete listing of carbon and oxygen isotopes).

Figure DR3. Lithologies of the upper House Limestone. A. View of section BTop. The “brown siltstone” is a silty dolostone that overlies an irregular erosion surface (low rank, 24<sup>th</sup> order sequence boundary), and may represent a thin LST (Miller et al., 2003). A succeeding

transgressive interval includes rhynchonelliform brachiopod shell beds (r.b.). The resistant “top bed of the House Formation” comprises most of a cycle that begins with a small-scale TST of intraclastic rudstone–grainstone with thrombotic buildups, and an overlying HST of subtidal heterolithic facies comprising layers of lime mudstone–wackstone, calcisiltite and biointraclastic packstone–grainstone. The base of the Fillmore Formation is traditionally placed at a break in slope at the “top bed” (Fig. S4A) but is placed herein at a lithologic change that occurs about a meter higher.

B. Condensed, transgressive, fining upward succession of intraclastic rudstone (r) and grainstone layers separated by planar to irregular hardgrounds. This interval also includes thrombotic buildups. Photographed along strike from BTop at section LDN (Fig. S1).

Figure DR4. Phanerozoic extinction percentages from Bambach et al. (2004), showing interval of data that are plotted in Figure 1 in our paper.

### **Part III. DATA TABLES**

The following pages include the individual data tables for the three sections (Lava Dam North, B-Top, and C-1965) used to build the composite in Fig. 2 and the close up of the base Stairsian in Fig. 3. The datum used to merge the sections and build the composite was the top of the House Limestone. In addition, the ‘brown siltstone’ and brachiopod shell beds in the uppermost House Limestone was utilized for Fig. 3.

**Table DR1: Isotope data from Lava Dam North section, Ibex, Utah**

| Sample # | Feet | $\delta^{13}\text{C}$ | $\delta^{18}\text{O}$ | Notes on fossil tie points                                                                       |
|----------|------|-----------------------|-----------------------|--------------------------------------------------------------------------------------------------|
| 7318     | 225  | 0.86                  | -9.00                 |                                                                                                  |
| 7322     | 245  | 0.85                  | -9.09                 |                                                                                                  |
| 7325     | 260  | 0.45                  | -8.78                 |                                                                                                  |
| 7329     | 280  | 0.03                  | -8.84                 |                                                                                                  |
| 7333     | 300  | -0.43                 | -9.07                 |                                                                                                  |
| 7337     | 320  | -0.55                 | -9.02                 |                                                                                                  |
| 7341     | 340  | -0.74                 | -8.65                 |                                                                                                  |
| 7345     | 360  | -0.74                 | -8.75                 |                                                                                                  |
| 7349     | 380  | -0.67                 | -8.81                 |                                                                                                  |
| 7353     | 400  | -0.68                 | -8.83                 |                                                                                                  |
| 7357     | 420  | -0.71                 | -8.76                 |                                                                                                  |
| 7361     | 440  | -0.83                 | -8.72                 |                                                                                                  |
| 7365     | 460  | -0.60                 | -8.91                 |                                                                                                  |
| 7369     | 480  | -0.85                 | -8.75                 |                                                                                                  |
| 7373     | 500  | -0.80                 | -8.69                 |                                                                                                  |
| 7377     | 520  | -0.85                 | -8.79                 | *note this is first LDN point used in Fig. 3                                                     |
| 7381     | 540  | -0.88                 | -8.81                 |                                                                                                  |
| 7382     | 545  | -0.90                 | -9.06                 |                                                                                                  |
| 7383     | 550  | -0.71                 | -9.04                 |                                                                                                  |
| 7385     | 560  | -0.72                 | -8.64                 |                                                                                                  |
| 7386     | 565  | -0.80                 | -9.00                 |                                                                                                  |
| 7387     | 570  | -0.94                 | -9.14                 |                                                                                                  |
| 7388     | 575  | -0.59                 | -8.84                 |                                                                                                  |
| 7389     | 580  | -0.27                 | -8.81                 | <u>Hintze</u> <u>Adrain-Westrop</u><br>?Bellefont<br>ia at                                       |
| 7390     | 585  | -0.34                 | -8.87                 | 585.5 "Brown siltstone" at 585.7 ft (148.7m )<br>Parapleth<br>opeltis at                         |
| 7391     | 590  | 0.02                  | -8.96                 | 586 Brach bed at 588 4 ft (149.5 m)<br><br>Parapleth<br>opeltis at<br>593 and<br>Leoistegiu<br>m |
| 7392     | 595  |                       |                       | Thrombolitic buildup, 592.3 ft (150.7m)                                                          |
| 7393     | 600  | 0.55                  | -8.48                 |                                                                                                  |
| 7395     | 610  | 1.03                  | -8.94                 |                                                                                                  |

**Table DR2: Isotope data from B-Top section, Ibex, Utah**

| Sample # | Feet  | $\delta^{13}\text{C}$ | $\delta^{18}\text{O}$ | Notes                                 |
|----------|-------|-----------------------|-----------------------|---------------------------------------|
| 7396     | 0     | -0.78                 | -8.76                 |                                       |
| 7397     | 2.46  | -1.10                 | -9.05                 |                                       |
| 7398     | 4.92  | -0.93                 | -8.91                 |                                       |
| 7399     | 7.38  | -0.77                 | -8.98                 |                                       |
| 7400     | 9.84  | -0.45                 | -8.53                 |                                       |
| 7400b    | 9.84  | -0.81                 | -9.16                 |                                       |
| 7401     | 12.3  | -0.25                 | -8.96                 |                                       |
| 7402     | 14.76 | -0.27                 | -8.96                 |                                       |
| 7403     | 17.22 | -0.42                 | -8.93                 |                                       |
| 7404     | 19.68 | -0.25                 | -8.69                 | brown siltstone at 19.68 ft (6m)      |
| 7404b    | 19.68 | -0.41                 | -9.03                 |                                       |
| 7405     | 22.14 | -0.27                 | -8.78                 | brachs/extinction at 22.14 ft (6.75m) |
| 7406     | 24.6  | 0.02                  | -8.99                 |                                       |
| 7407     | 27.06 | 0.51                  | -8.96                 | thrombolites at 26.24 ft (8m)         |
| 7408     | 29.52 | 0.49                  | -8.70                 |                                       |
| 7408b    | 29.52 | 0.37                  | -9.06                 |                                       |
| 7410     | 34.44 | 0.91                  | -9.01                 |                                       |
| 7411     | 36.9  | 0.77                  | -9.06                 |                                       |
| 7412     | 39.36 | 0.92                  | -8.62                 | top House Fm. at 38.54 ft (11.75m)    |
| 7416     | 49.2  | 1.23                  | -8.34                 |                                       |
| 7420     | 59.04 | 1.06                  | -8.57                 |                                       |
| 7424     | 68.88 | 1.36                  | -8.90                 |                                       |
| 7428     | 78.72 | 0.40                  | -8.82                 |                                       |

Note: Section measured from the top of the "brown siltstone"

**Table DR3: Isotope data from C-1965 section, Ibex, Utah**

| <b>Sample #</b> | <b>Feet</b> | <b><math>\delta^{13}\text{C}</math></b> | <b><math>\delta^{18}\text{O}</math></b> |
|-----------------|-------------|-----------------------------------------|-----------------------------------------|
| 7530            | 0           | 0.72                                    | -8.84                                   |
| 7532            | 10          | 0.91                                    | -8.41                                   |
| 7534            | 20          | 0.94                                    | -8.71                                   |
| 7536            | 30          | 1.00                                    | -8.98                                   |
| 7538            | 40          | 0.85                                    | -8.97                                   |
| 7540            | 50          | 0.28                                    | -9.00                                   |

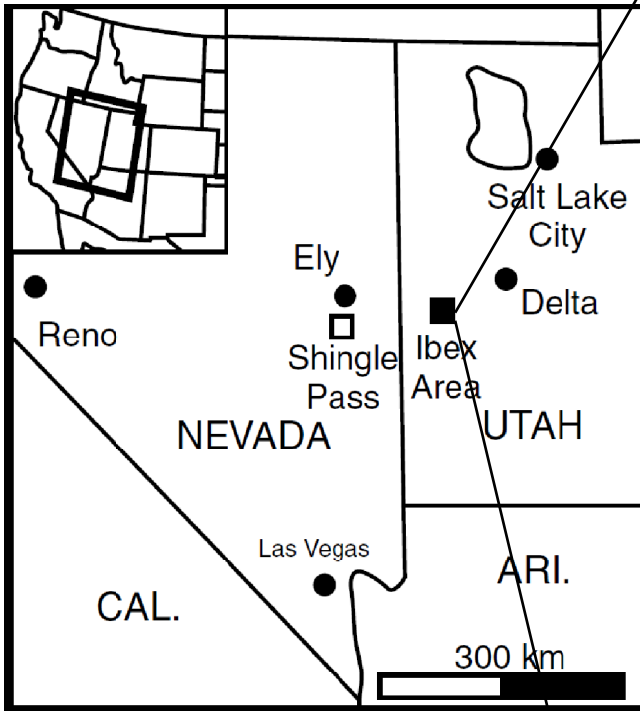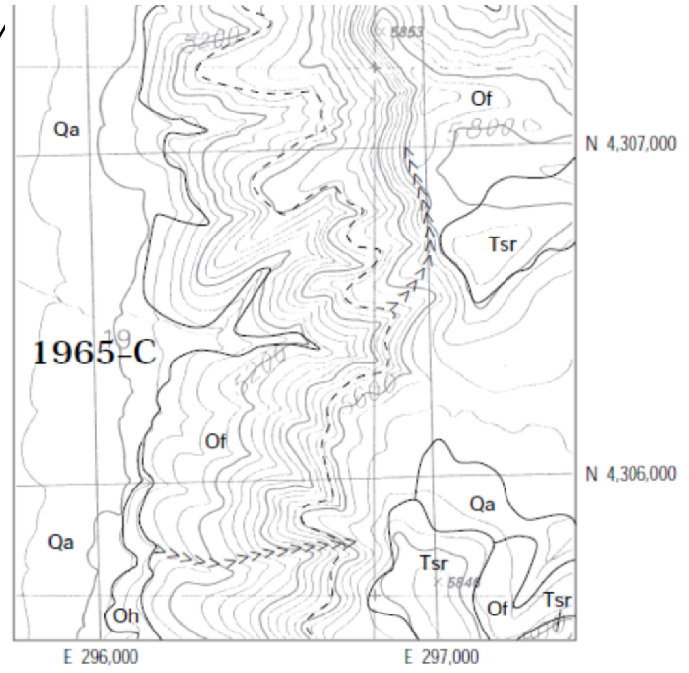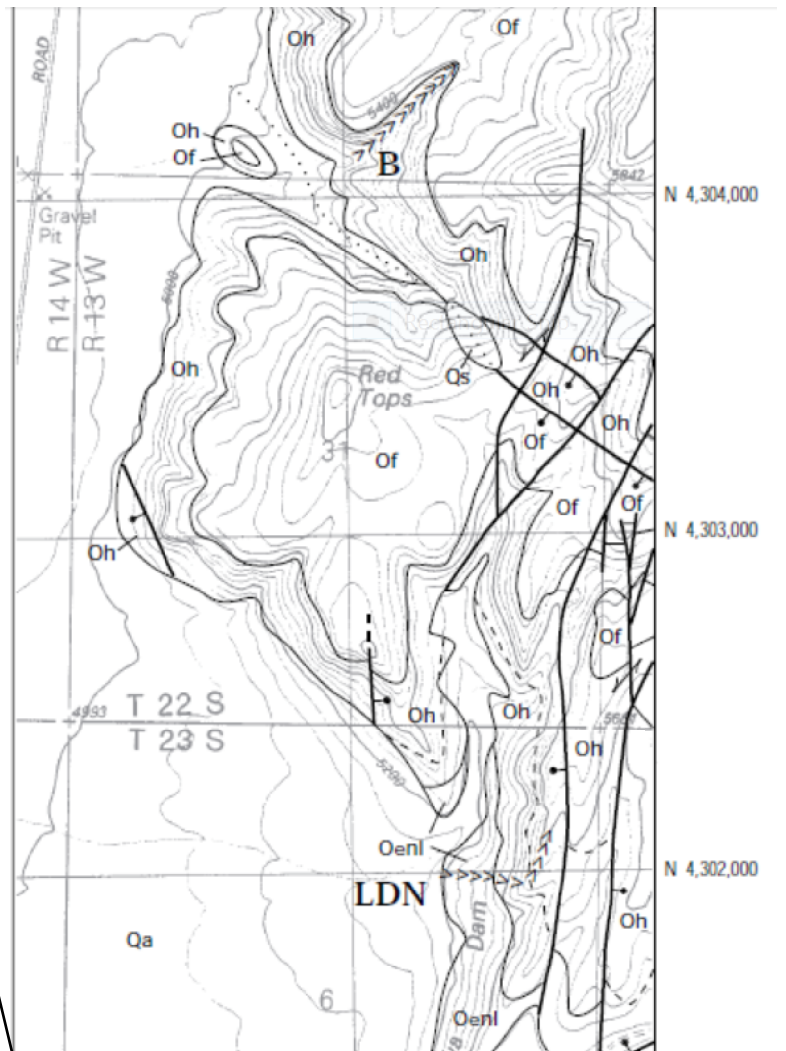

Figure DR1

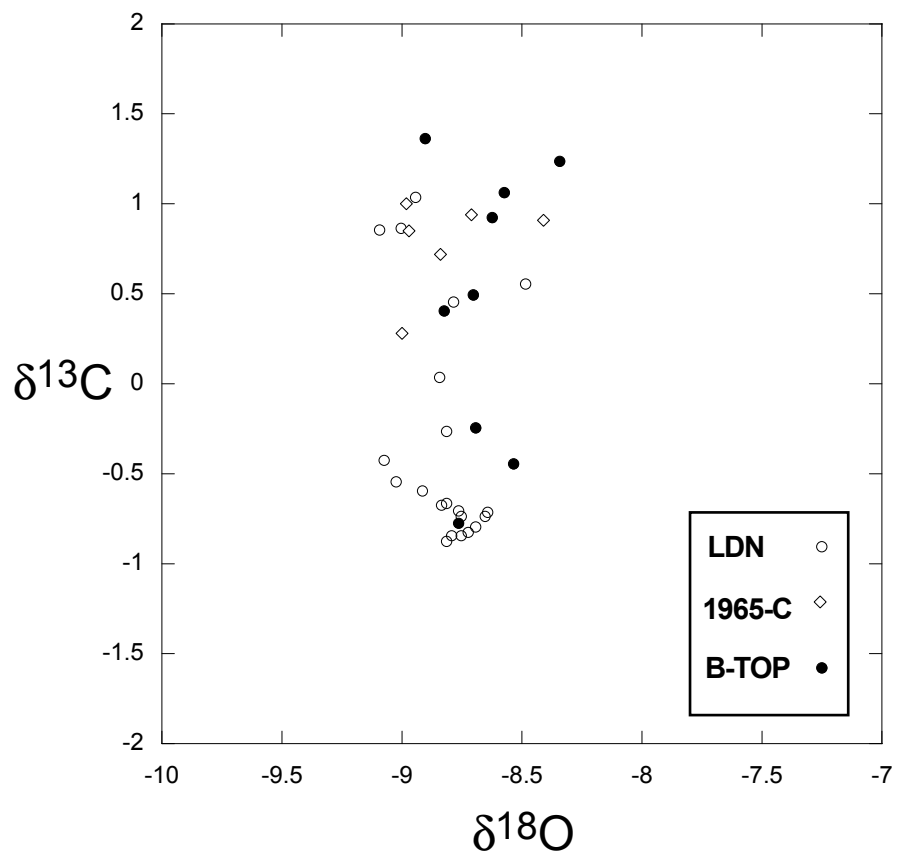



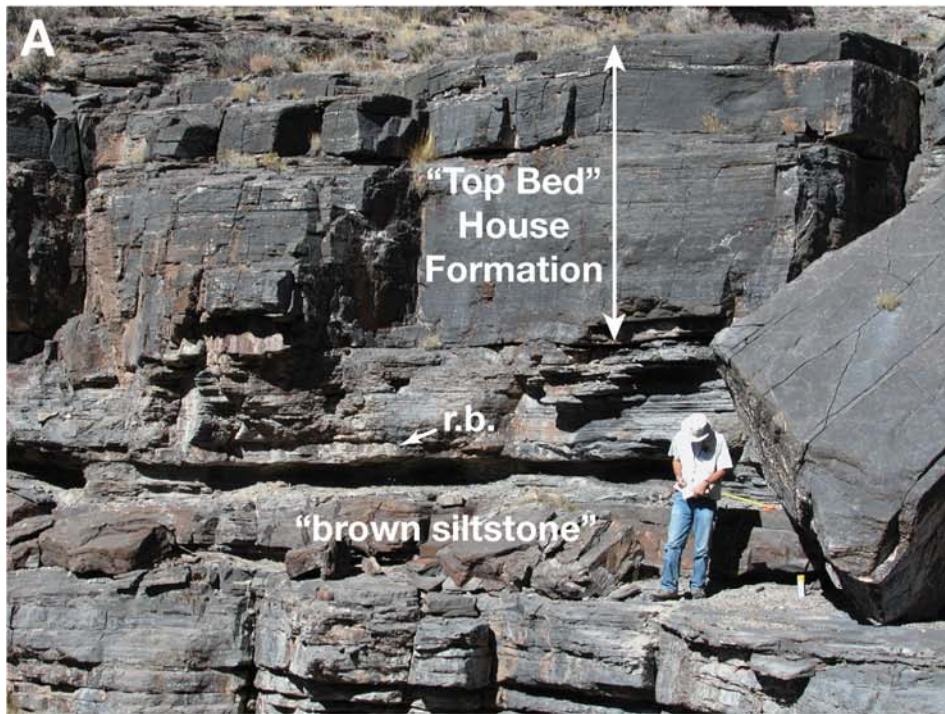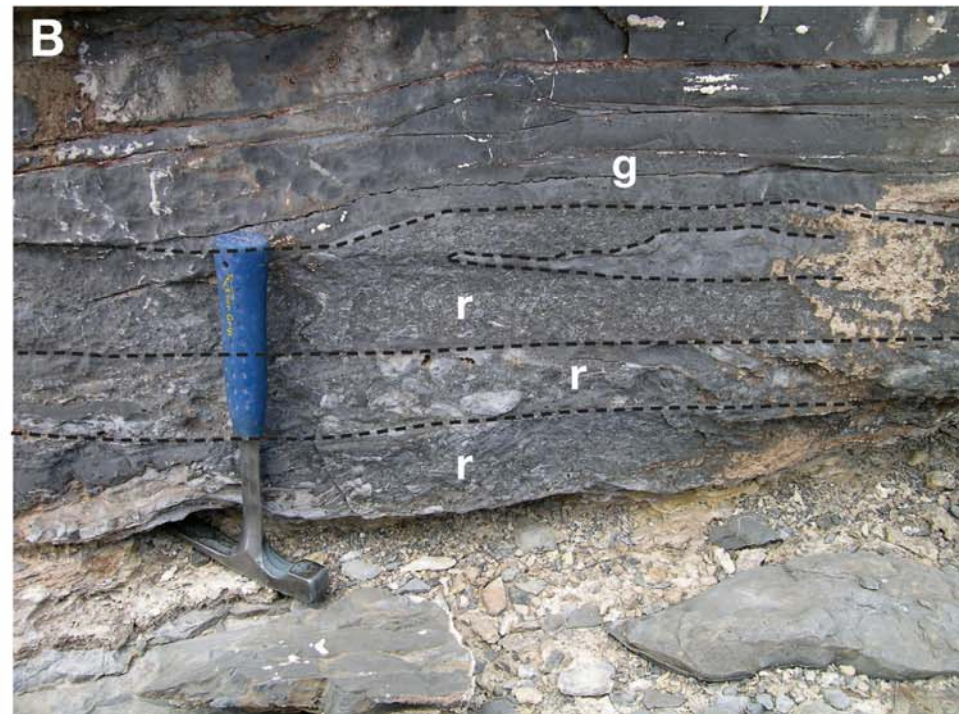

Figure DR3

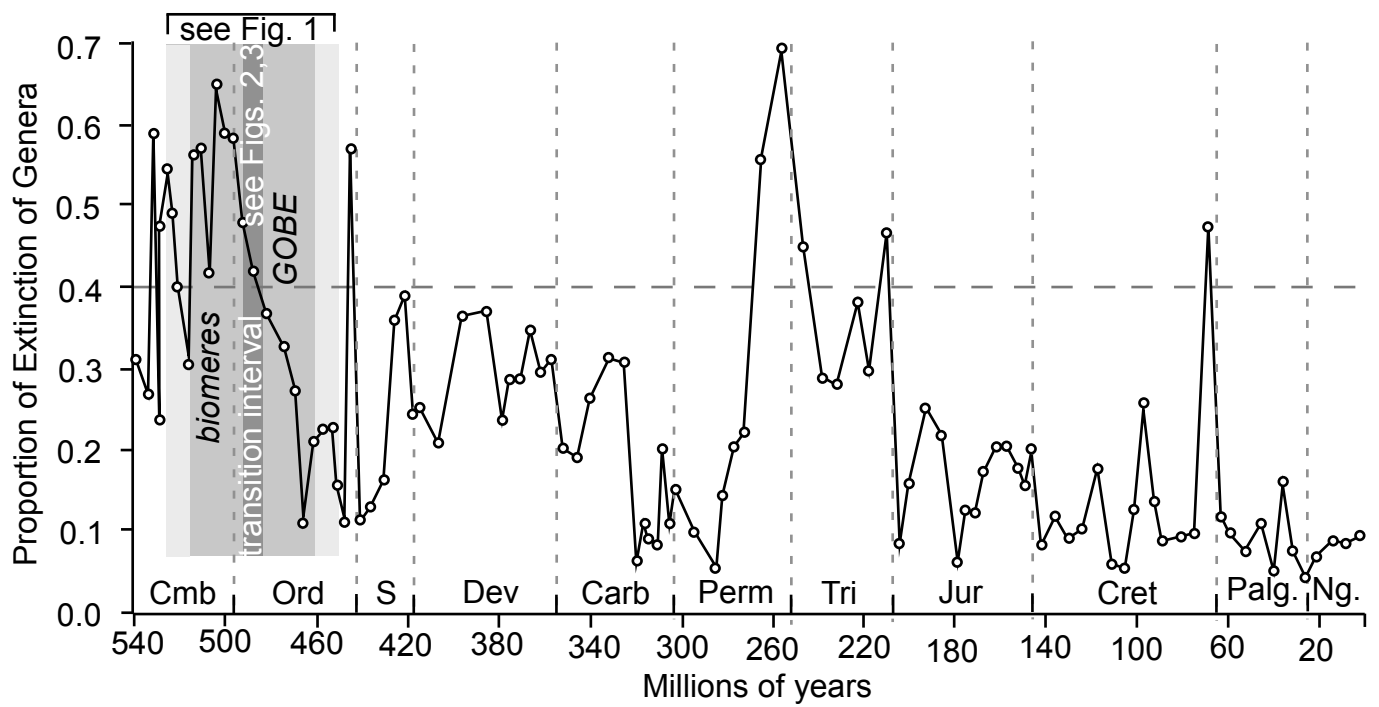

Figure DR 4. Saltzman et al. base Stairsian (modified after Bambach et al. 2004)
